# Supplementary material
Source: Springer Nature journal article supplement (https://www.springermedizin.de/resource/supplementary/12876_2011_656_MOESM6_ESM.pdf/9437188)

Cyclin D1

$\beta$ -actin

Control

Control

Saline

Saline

RLS

RLS

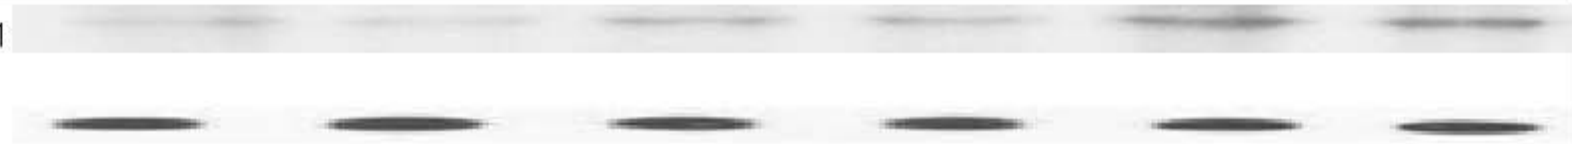

Supplement: MOESM6 [file 9437188]
